# Supplementary material for: Osmolality and Tonicity of Isotonic Beverages
Source: MDPI journal article supplement (doi:10.3390/foods13101483), 2024-05-10
Supplement: s1 [file s1]

**Supplementary Information for:**

## **Osmolality and Tonicity of Isotonic Beverages**

**Table S1.** Labelled content of nutrients per 100 mL of isotonic beverage.

| Sample   | Nutrients           | Components              | Per 100 mL |
|----------|---------------------|-------------------------|------------|
| sample 1 | carbohydrates       | fructose                | 4,2 g      |
|          | - of which of which | fructose                | 4,2 g      |
|          | sugars              |                         |            |
|          | salt                |                         | < 0,005 g  |
|          | sodium              |                         | < 0,002 g  |
|          | potassium           |                         |            |
|          | calcium             | calcium lactate         | 24 mg      |
|          | magnesium           | magnesium carbonates    | 11,3 mg    |
| sample 2 | carbohydrates       | fructose                | 4 g        |
|          | - of which sugars   | fructose                | 4 g        |
|          | salt                |                         | 0 g        |
|          | sodium              | sodium citrate          | /          |
|          | potassium           | potassium citrate       |            |
|          | calcium             | calcium lactate         |            |
|          | magnesium           | magnesium carbonates    |            |
| sample 3 | carbohydrates       | fructose syrup          | 5,0 g      |
|          | - of which sugars   | fructose syrup          | 2,8 g      |
|          | salt                |                         | < 0,1 g    |
|          | sodium              |                         | < 0,04 g   |
|          | potassium           |                         |            |
|          | calcium             |                         |            |
|          | magnesium           | magnesium carbonates    | 11,3 mg    |
| sample 4 | carbohydrates       | maltodextrin            | 5,9 g      |
|          | - of which sugars   |                         | 3,9 g      |
|          | salt                |                         | 0,13 g     |
|          | sodium              | sodium citrate          | 0,052 g    |
|          | potassium           | monopotassium phosphate |            |
|          | calcium             |                         |            |
|          | magnesium           | magnesium oxide         |            |

|          |                   |                                                            |           |
|----------|-------------------|------------------------------------------------------------|-----------|
| sample 5 | carbohydrates     | maltodextrin, glucose                                      | 4 g       |
|          | - of which sugars | glucose                                                    | 3,5 g     |
|          | salt              |                                                            | 0,14 g    |
|          | sodium            | trisodium citrate,<br>sodium benzoate                      | 0,056 g   |
|          | potassium         | tripotassium citrate,<br>potassium sorbate                 | 68,2 mg   |
|          | calcium           | calcium lactate                                            | 22,6 mg   |
|          | magnesium         | magnesium carbonate                                        | 10,9 mg   |
| sample 6 | carbohydrates     |                                                            | 4,5 g     |
|          | - of which sugars |                                                            | 4,5 g     |
|          | salt              |                                                            | < 0,01 g  |
|          | sodium            |                                                            | < 0,004 g |
|          | potassium         | tripotassium citrate                                       |           |
|          | calcium           |                                                            |           |
|          | magnesium         | magnesium carbonate                                        | 11,3 mg   |
| sample 7 | carbohydrates     | maltodextrin, sucrose,<br>glucose                          | 6,2 g     |
|          | - of which sugars | sucrose, glucose                                           | 5,4 g     |
|          | salt              | sodium chloride                                            | 0,13 g    |
|          | sodium            | sodium chloride,<br>sodium citrate, sodium<br>benzoate     | 50 mg     |
|          | potassium         | potassium chloride,<br>potassium sorbate                   | 17 mg     |
|          | calcium           | dicalcium phosphate,<br>calcium lactate                    | 12 mg     |
|          | magnesium         | magnesium citrate                                          | 1,5 mg    |
| sample 8 | carbohydrates     | fructose                                                   | 4,0 g     |
|          | - of which sugars | fructose                                                   | 4,0 g     |
|          | salt              | sodium chloride                                            | 0,10 g    |
|          | sodium            | sodium chloride,<br>trisodium citrate,<br>sodium benzoate, | 0,04 g    |
|          | potassium         | potassium chloride,<br>potassium sorbate                   |           |
|          | calcium           | calcium chloride                                           | 24 mg     |
|          | magnesium         | magnesium salt of<br>citric acid                           | 11 mg     |

|           |                   |                                                        |                                |
|-----------|-------------------|--------------------------------------------------------|--------------------------------|
| sample 9  | carbohydrates     | glucose, fructose                                      | 3,9 g                          |
|           | - of which sugars | glucose, fructose                                      | 3,9 g                          |
|           | salt              | sodium chloride                                        | 0,13 g                         |
|           | sodium            | sodium chloride                                        | 0,052 g                        |
|           | potassium         |                                                        |                                |
|           | calcium           |                                                        |                                |
|           | magnesium         |                                                        |                                |
| sample 10 | carbohydrates     | maltodextrin, sucrose,<br>glucose syrup                | 6,9 g                          |
|           | - of which sugars | sucrose, glucose syrup                                 | 5,9 g                          |
|           | salt              | sodium chloride                                        | 0,18 g                         |
|           | sodium            | sodium chloride,<br>sodium citrate                     | 0,07 g                         |
|           | potassium         | potassium chloride                                     |                                |
|           | calcium           | phosphorous acid<br>calcium salt                       | 31,0 mg                        |
|           | magnesium         | magnesium carbonate                                    | 12,5 mg                        |
| sample 11 | carbohydrates     |                                                        | 5,3 g                          |
|           | - of which sugars |                                                        | 3,6 g                          |
|           | salt              |                                                        | contains negligible<br>amounts |
|           | sodium            |                                                        |                                |
|           | potassium         |                                                        |                                |
|           | calcium           |                                                        |                                |
|           | magnesium         |                                                        |                                |
| sample 12 | carbohydrates     |                                                        | 0 g                            |
|           | - of which sugars |                                                        | 0 g                            |
|           | salt              | sodium chloride                                        | 32 mg                          |
|           | sodium            | sodium chloride,<br>sodium citrate, sodium<br>benzoate | 12,8 mg                        |
|           | potassium         | potassium sorbate                                      | up to 25 mg                    |
|           | calcium           |                                                        |                                |
|           | magnesium         | magnesium citrate                                      | 12 mg                          |

|           |                   |                                           |          |
|-----------|-------------------|-------------------------------------------|----------|
| sample 13 | carbohydrates     | maltodextrin, sucrose,<br>glucose syrup   | 7 g      |
|           | - of which sugars | sucrose, glucose syrup                    | 5,6 g    |
|           | salt              | sodium chloride                           | 0,22 g   |
|           | sodium            | sodium chloride,<br>sodium citrate        | 0,088 g  |
|           | potassium         |                                           |          |
|           | calcium           | phosphorous acid<br>calcium salt          | 32 mg    |
|           | magnesium         | magnesium carbonate                       | 12,4 mg  |
| sample 14 | carbohydrates     | maltodextrin                              | 6,5 g    |
|           | - of which sugars |                                           | 5,6 g    |
|           | salt              |                                           | 0,03 g   |
|           | sodium            | sodium citrate                            | 0,012 g  |
|           | potassium         |                                           |          |
|           | calcium           | calcium lactate                           | 24,0 mg  |
|           | magnesium         | magnesium carbonate                       | 11,5 mg  |
| sample 15 | carbohydrates     | maltodextrin, glucose                     | 7,2 g    |
|           | - of which sugars | glucose                                   | 6,6 g    |
|           | salt              |                                           | 0,13 g   |
|           | sodium            | sodium citrate                            | 0,0504 g |
|           | potassium         | potassium chloride                        |          |
|           | calcium           | calcium phosphate                         |          |
|           | magnesium         | magnesium citrate,<br>magnesium carbonate | 30,4 mg  |
| sample 16 | carbohydrates     |                                           | 4,4 g    |
|           | - of which sugars |                                           | 4,2 g    |
|           | salt              |                                           | 0,043 g  |
|           | sodium            |                                           | 0,0172 g |
|           | potassium         |                                           |          |
|           | calcium           |                                           |          |
|           | magnesium         |                                           |          |
| sample 17 | carbohydrates     | maltodextrin, glucose                     | 6,7 g    |
|           | - of which sugars | glucose                                   | 4,4 g    |
|           | salt              |                                           | 0,12 g   |
|           | sodium            | sodium citrate, sodium<br>benzoate        | 0,048 g  |
|           | potassium         | potassium citrate,<br>potassium sorbate   |          |
|           | calcium           |                                           |          |
|           | magnesium         |                                           |          |

|           |                      |                                 |         |
|-----------|----------------------|---------------------------------|---------|
| sample 18 | carbohydrates        | maltodextrin, glucose           | 5,1 g   |
|           | - of which sugars    | glucose                         | 3,8 g   |
|           | salt                 |                                 | 0,14 g  |
|           | sodium               | sodium citrate, sodium benzoate | 0,056 g |
|           | potassium            | potassium sorbate               |         |
|           | calcium<br>magnesium |                                 |         |

**Table S2.** Experimentally measured Na<sup>+</sup>, K<sup>+</sup>, and Mg<sup>2+</sup> content in isotonic beverages.

| Sample | Average Na <sup>+</sup> content<br>(mg/100 mL) | Average K <sup>+</sup> content<br>(mg/100 mL) | Average Mg <sup>2+</sup> content<br>(mg/100 mL) |
|--------|------------------------------------------------|-----------------------------------------------|-------------------------------------------------|
| 1      | 1 ± 0                                          | 0,1 ± 0,0                                     | 14,3 ± 1,8                                      |
| 2      | 12 ± 6                                         | 38,3 ± 3,0                                    | 9,0 ± 0,9                                       |
| 3      | 1 ± 0                                          | 25,7 ± 1, ±                                   | 14,6 ± 1,7                                      |
| 4      | 53 ± 7                                         | 13,7 ± 0,6                                    | 5,5 ± 0,4                                       |
| 5      | 55 ± 3                                         | 50,2 ± 12,1                                   | 4,8 ± 0,2                                       |
| 6      | 3 ± 1                                          | 78,8 ± 6,2                                    | 11,6 ± 0,8                                      |
| 7      | 61 ± 10                                        | 21,3 ± 0,8                                    | 1,7 ± 0,0                                       |
| 8      | 45 ± 8                                         | 17,6 ± 1,3                                    | 12,5 ± 0,7                                      |
| 9      | 61 ± 4                                         | 1,3 ± 0,2                                     | 0,4 ± 0,0                                       |
| 10     | 94 ± 30                                        | 20,9 ± 0,5                                    | 13,4 ± 1,1                                      |
| 11     | 0 ± 0                                          | 38,0 ± 1,5                                    | 4,2 ± 0,6                                       |
| 12     | 88 ± 15                                        | 8,3 ± 1,1                                     | 14,2 ± 0,2                                      |
| 13     | 98 ± 8                                         | 0,2 ± 0,1                                     | 14,2 ± 1,9                                      |
| 14     | 15 ± 2                                         | 0,4 ± 0,0                                     | 11,9 ± 0,8                                      |
| 15     | 53 ± 30                                        | 24,6 ± 2,8                                    | 33,4 ± 4,7                                      |
| 16     | 10 ± 11                                        | 34,3 ± 9,0                                    | 4,4 ± 0,5                                       |
| 17     | 52 ± 23                                        | 15,4 ± 1,8                                    | 1,7 ± 0,1                                       |
| 18     | 54 ± 24                                        | 7,4 ± 0,9                                     | 0,0 ± 0,0                                       |

**Table S3.** Experimentally measured pH values of isotonic beverages.

| Sample | pH   |
|--------|------|
| 1      | 3,93 |
| 2      | 3,39 |
| 3      | 4,02 |
| 4      | 3,28 |
| 5      | 3,78 |
| 6      | 3,79 |
| 7      | 3,76 |
| 8      | 3,45 |
| 9      | 2,60 |
| 10     | 3,96 |
| 11     | 4,40 |
| 12     | 3,74 |
| 13     | 4,14 |
| 14     | 3,70 |
| 15     | 4,54 |
| 16     | 5,65 |
| 17     | 3,87 |
| 18     | 3,67 |

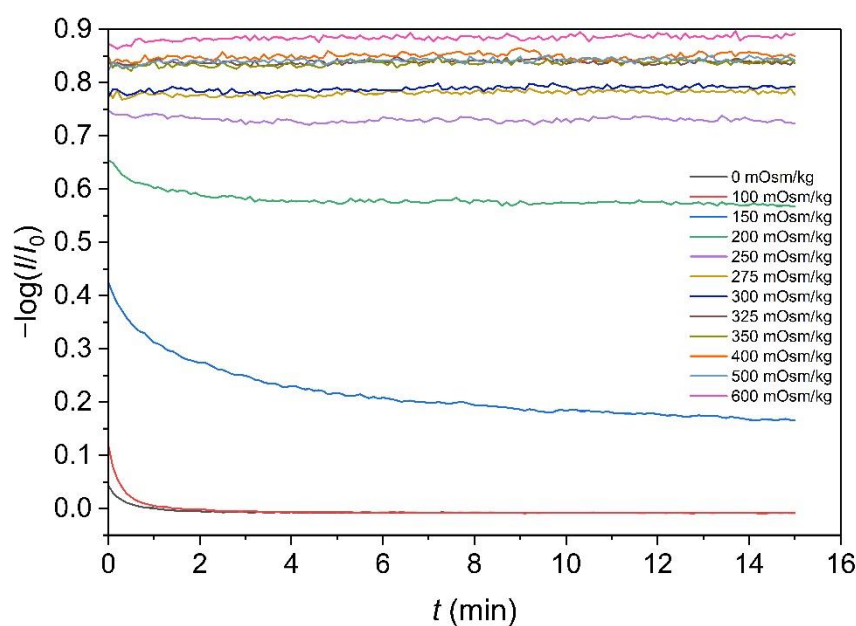

**Figure S1.** Kinetics of standard sodium chloride solutions. Erythrocytes lyse in 0 mOsm/kg and in 100 mOsm/kg solutions within 1 minute, as the values of  $-\log(I/I_0)$  drop to 0. In 150 and 200 mOsm/kg solution, only a part of erythrocytes is lysed, since  $-\log(I/I_0)$  does not reach the same low values as in the case of 0 and 100 mOsm/kg solution.  $-\log(I/I_0)$  value increases with increasing osmolality, but the differences between the spectra for solutions with osmolality greater than 250 mOsm/kg are negligible and cannot set a clear boundary between isotonic and hypertonic solution.

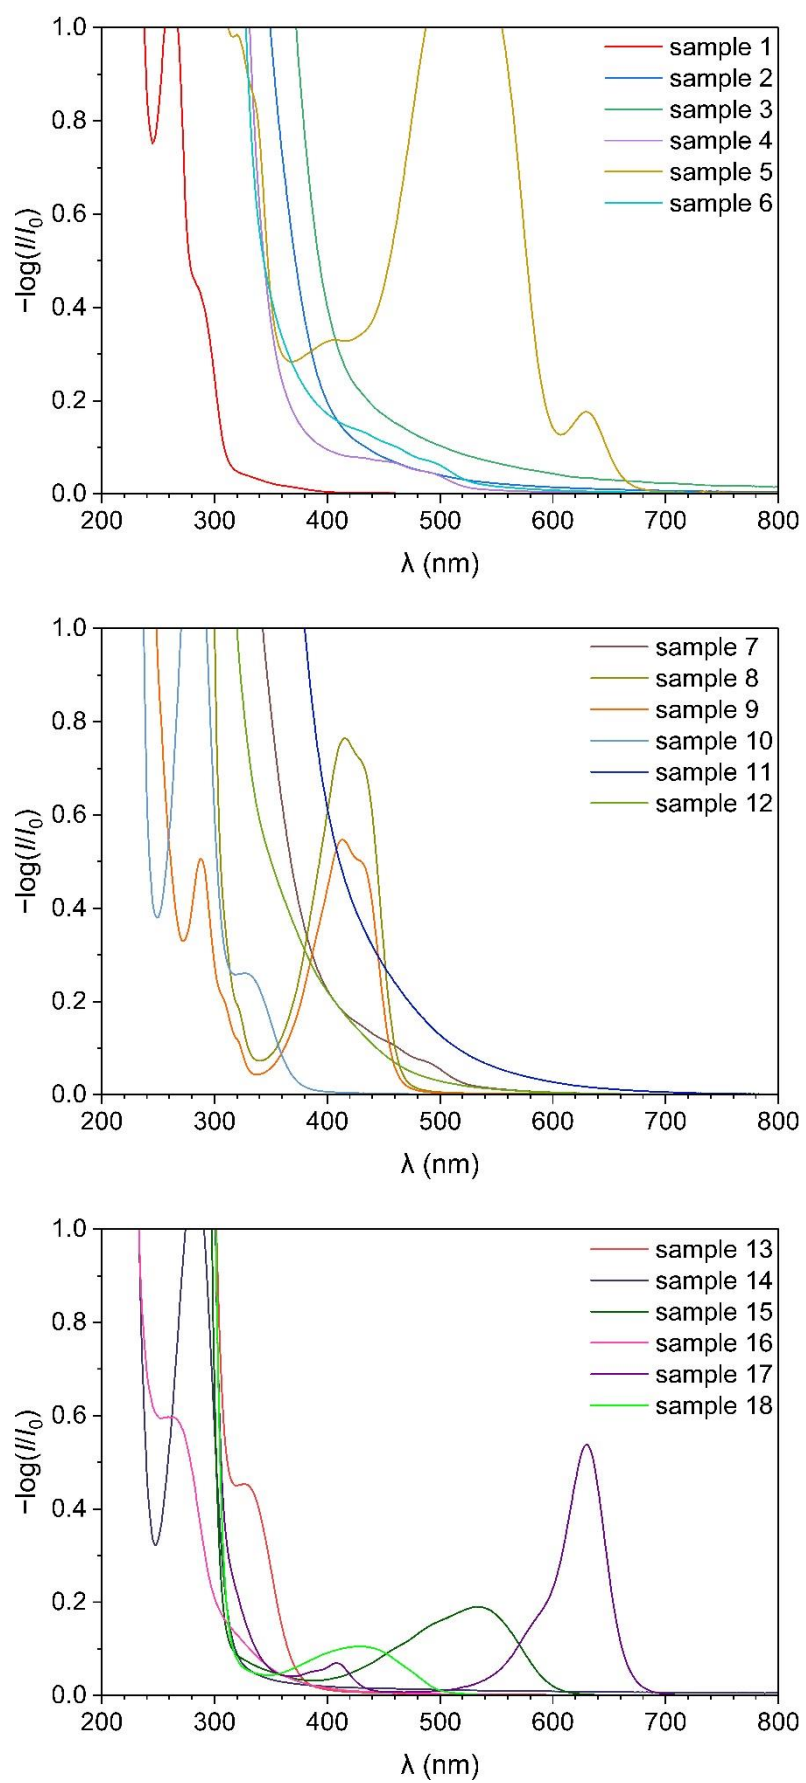

**Figure S2.** Spectrum of light scatter and absorption of isotonic beverages.



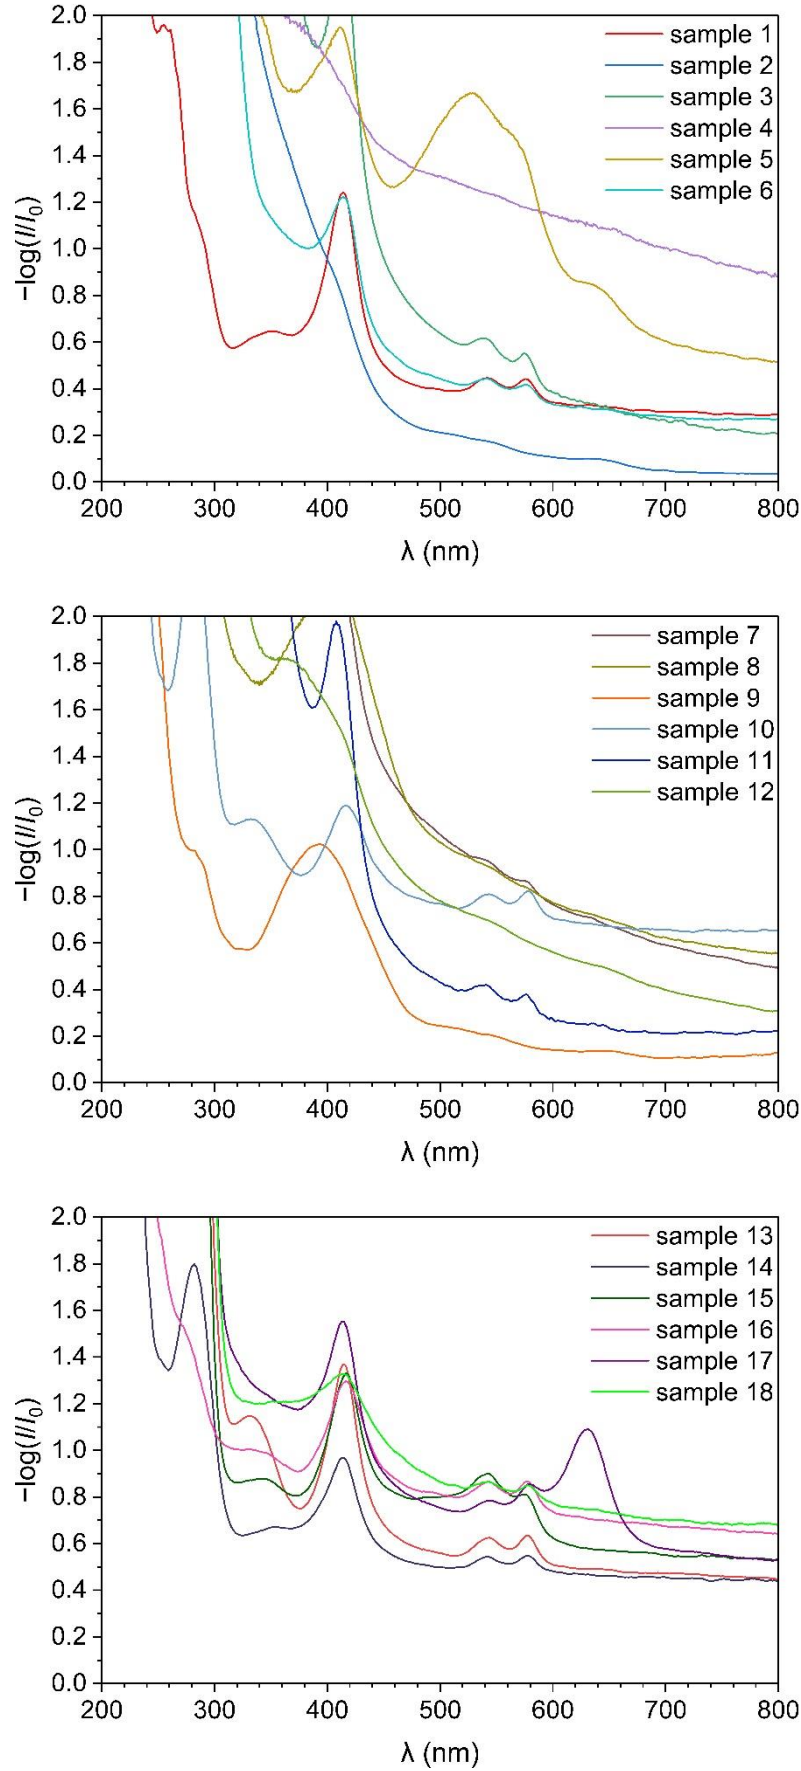

**Figure S3.**  $-\log(I/I_0)$  as a function of wavelength for suspensions of erythrocytes in isotonic beverages. Typical peaks for hemoglobin can be observed here, except for samples 2, 4, 7, 8 and 12.

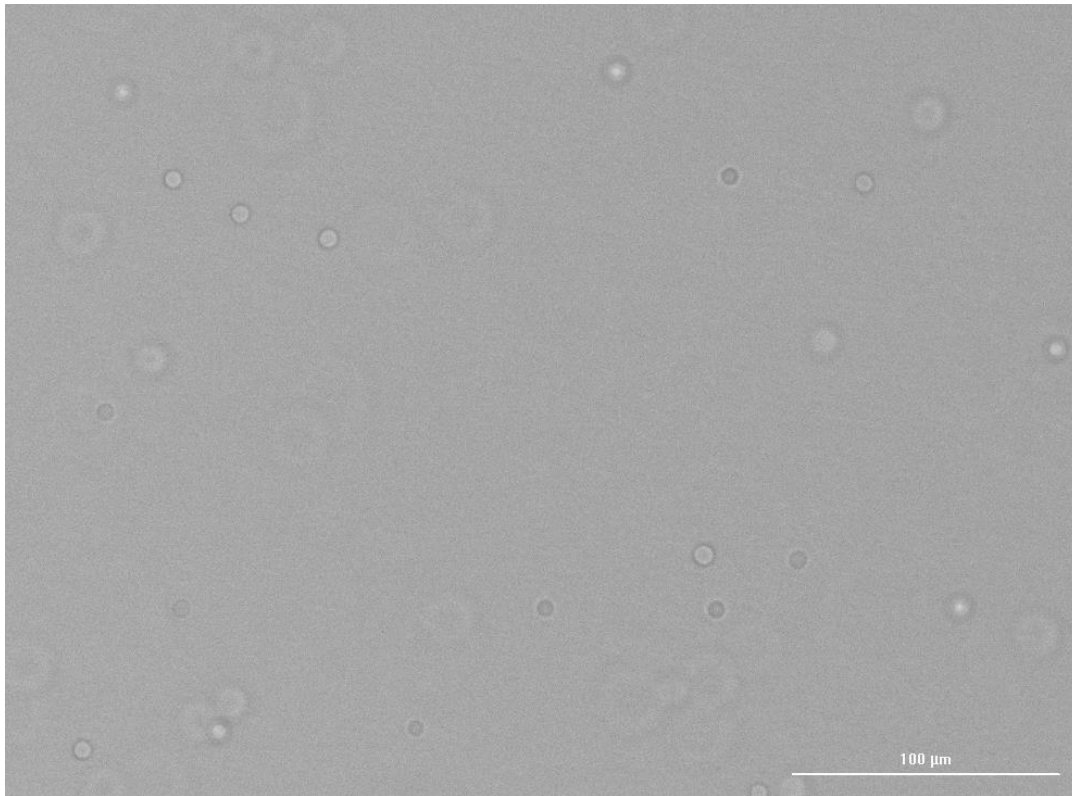

**Figure S4.** Erythrocytes in 0 mOsm/kg NaCl solution.

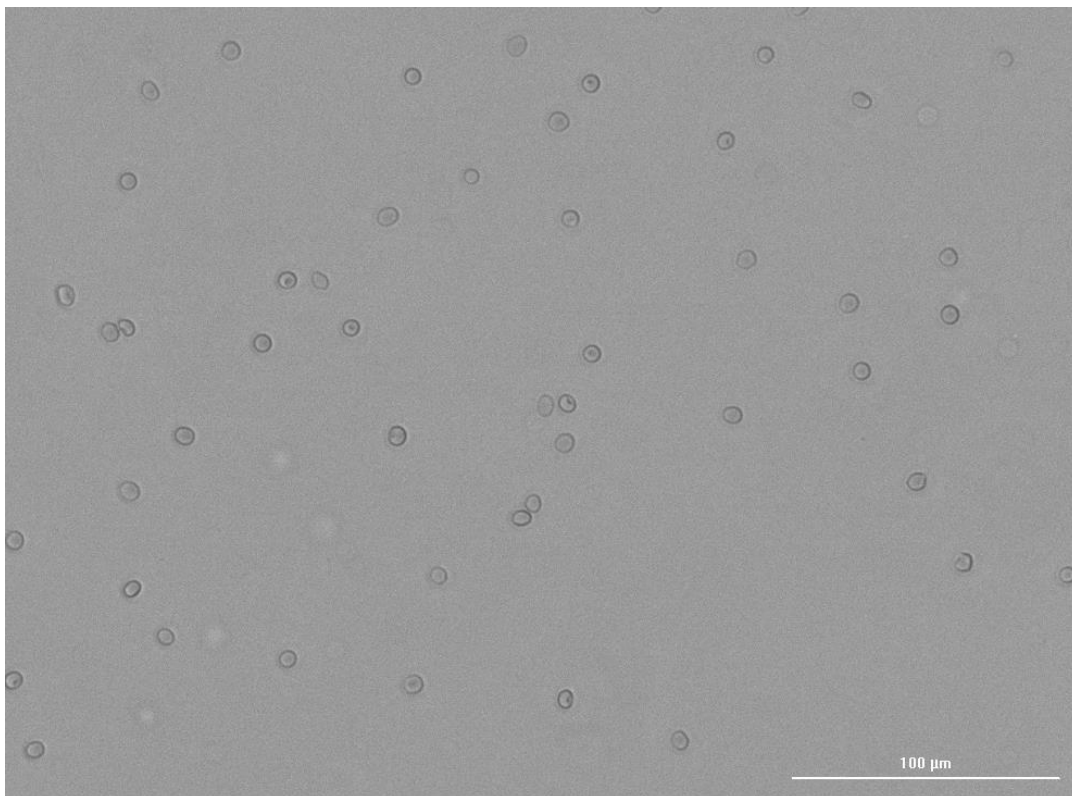

**Figure S5.** Erythrocytes in 100 mOsm/kg NaCl solution.

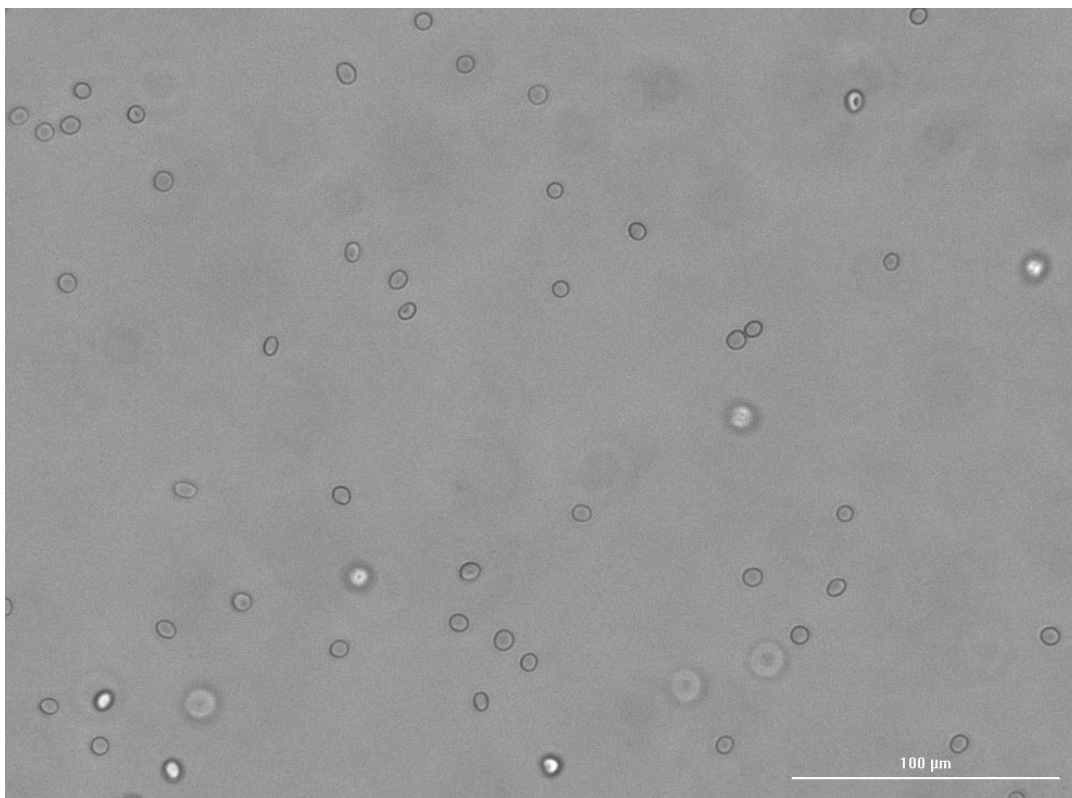

**Figure S6.** Erythrocytes in 150 mOsm/kg NaCl solution.

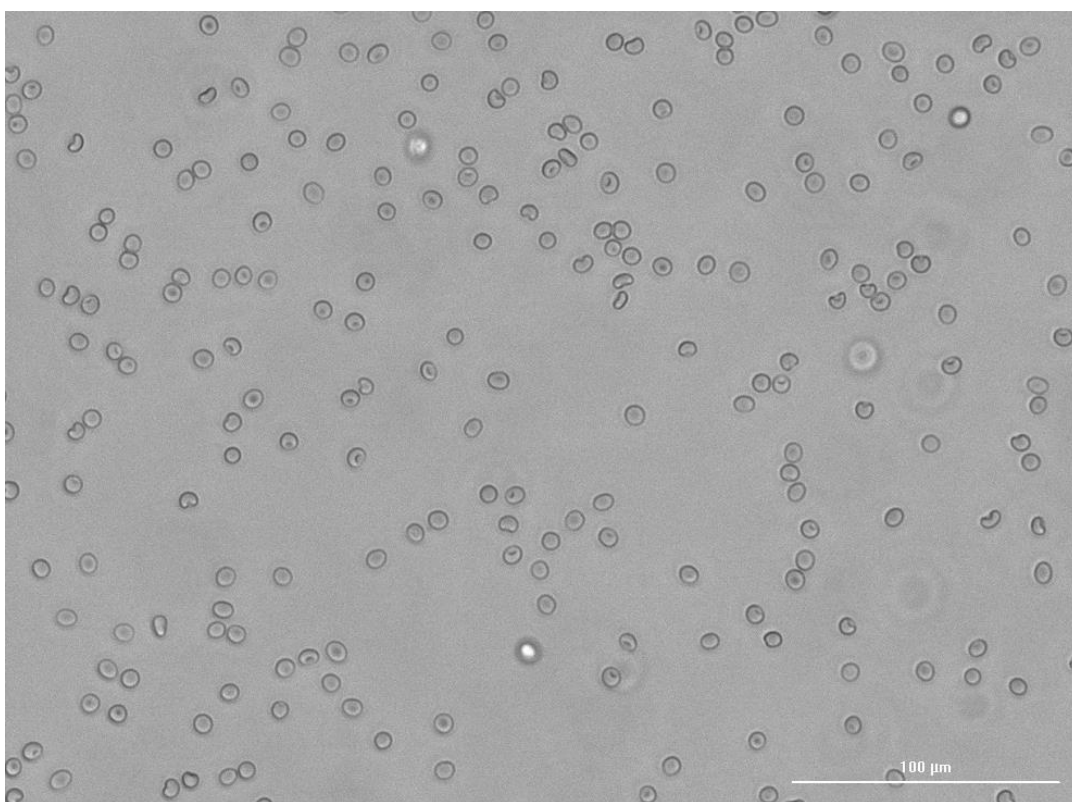

**Figure S7.** Erythrocytes in 200 mOsm/kg NaCl solution.

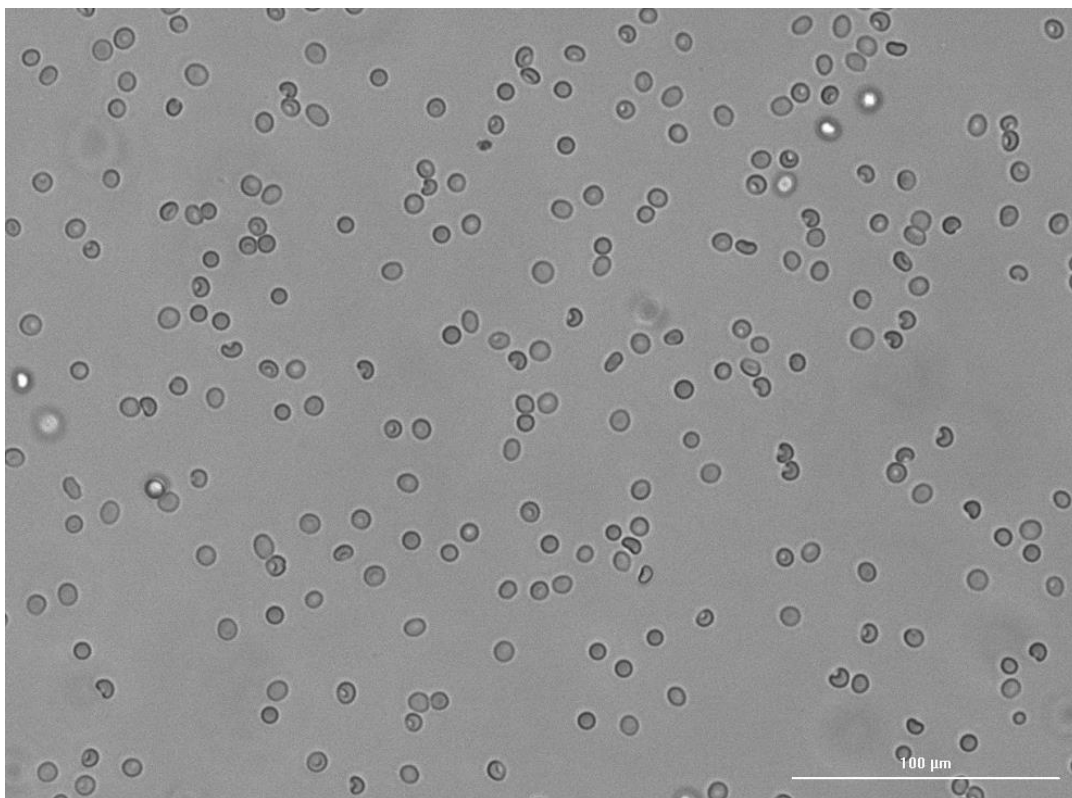

**Figure S8.** Erythrocytes in 250 mOsm/kg NaCl solution.

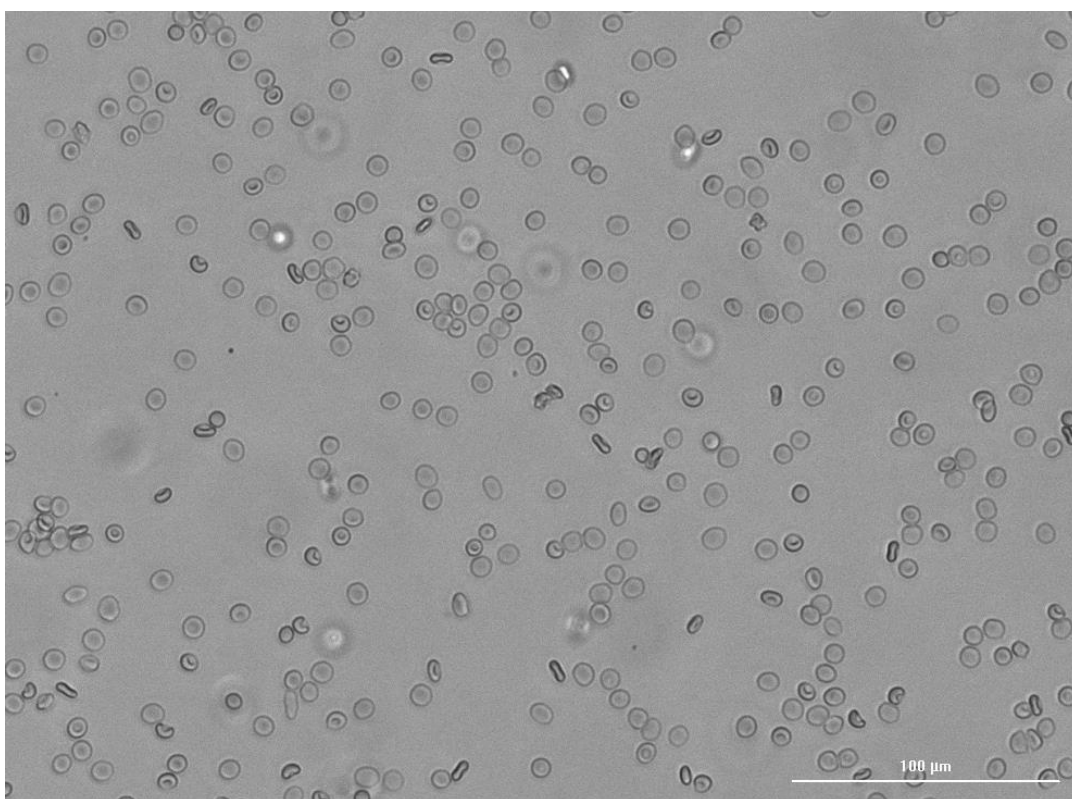

**Figure S9.** Erythrocytes in 275 mOsm/kg NaCl solution.

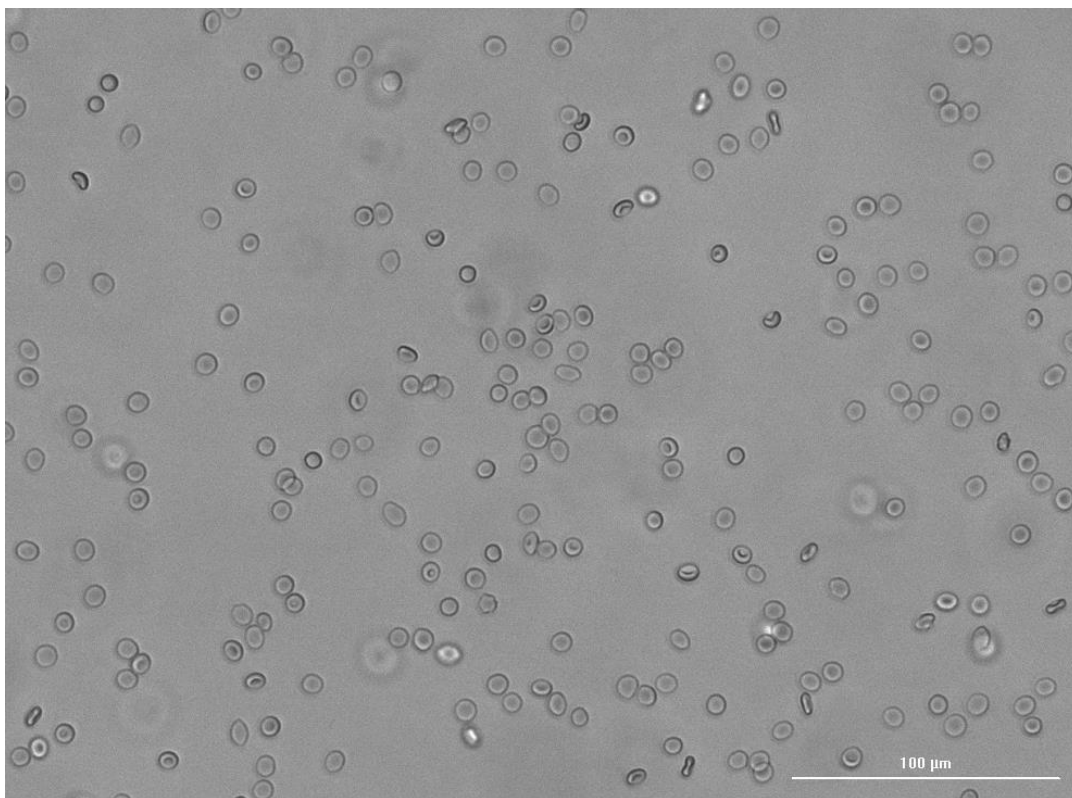

**Figure S10.** Erythrocytes in 300 mOsm/kg NaCl solution.

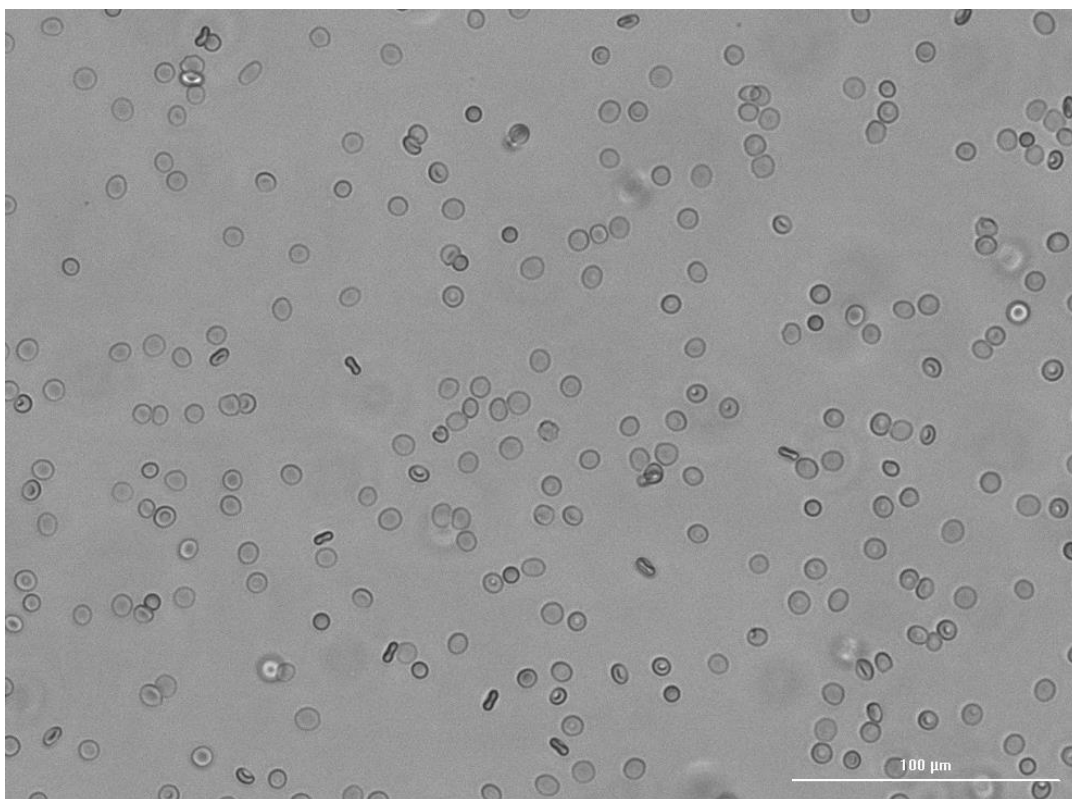

**Figure S11.** Erythrocytes in 325 mOsm/kg NaCl solution.



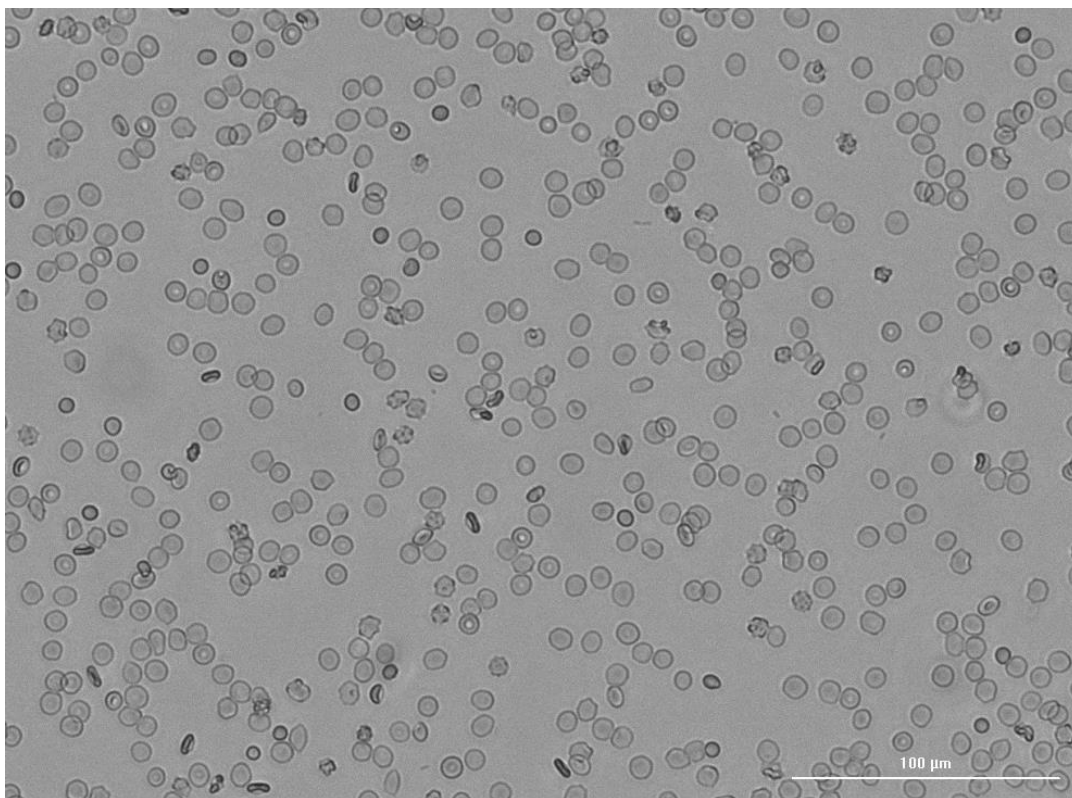

**Figure S12.** Erythrocytes in 350 mOsm/kg NaCl solution.

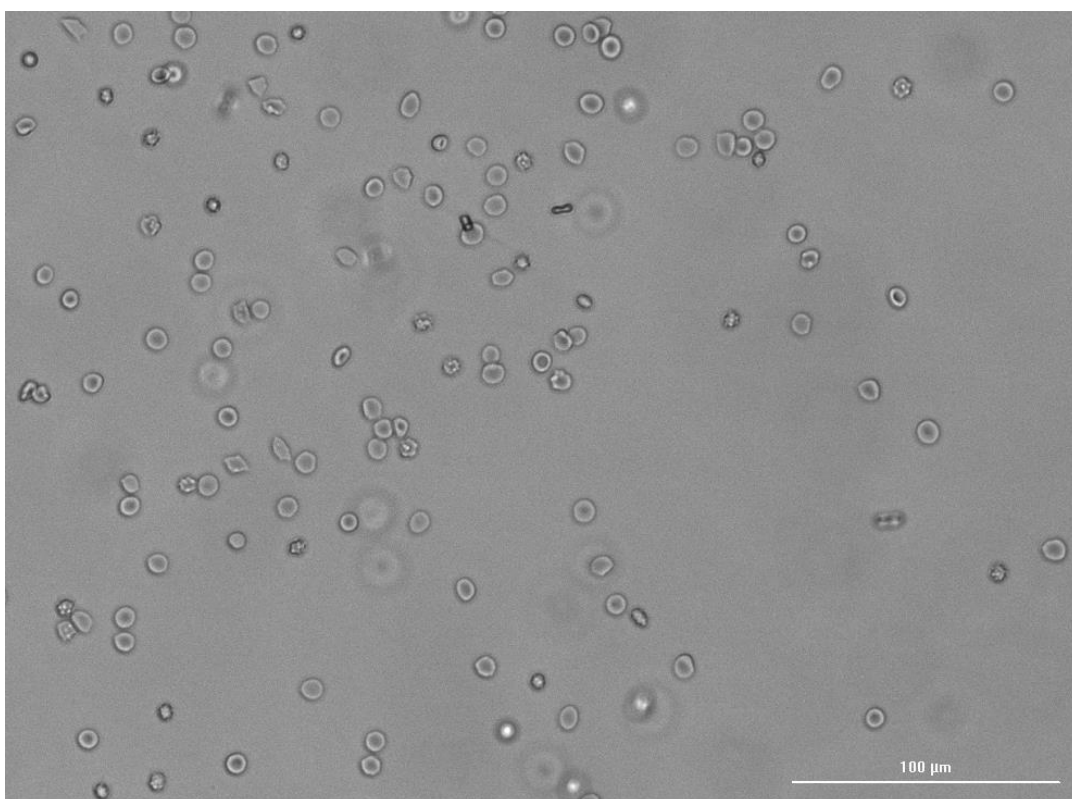

**Figure S13.** Erythrocytes in 400 mOsm/kg NaCl solution.

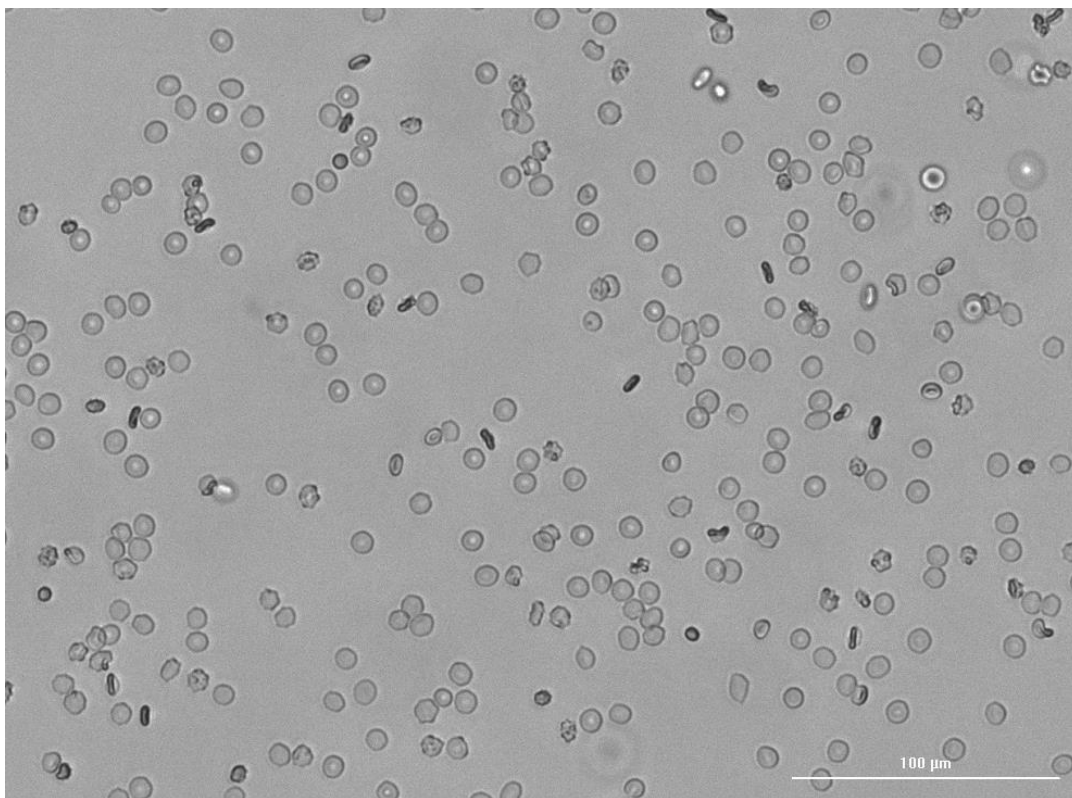

**Figure S14.** Erythrocytes in 500 mOsm/kg NaCl solution.

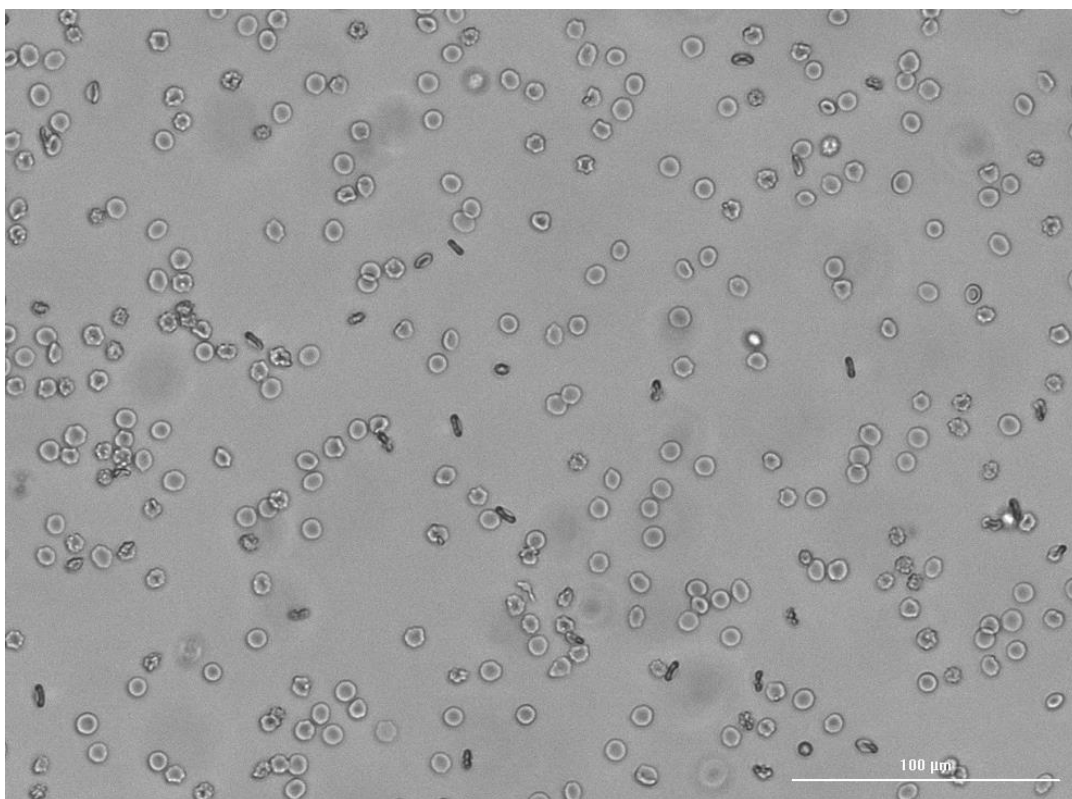

**Figure S15.** Erythrocytes in 600 mOsm/kg NaCl solution.
